# Supplementary material
Source: HighWire-hosted journal article supplement (https://cmajopen.ca/highwire/filestream/81258/field_highwire_adjunct_files/0/2019-0220-1-at.pdf)
Supplement: 2019-0220-1-at.pdf [file 2019-0220-1-at.pdf]

**Appendix 1 (as supplied by the authors): Study survey (administered via interview format)**

*“The first part of our survey is just a way for us to get to know a little bit about you.”*

Participant was given a copy of the information sheet (Exhibit 1)

Participant has provided verbal consent

|                              |                                                    |                                                            |
|------------------------------|----------------------------------------------------|------------------------------------------------------------|
| <b>Participant ID Number</b> | <b>Date of Survey (dd/mm/yy)</b><br>____/____/____ | <b>Interviewer’s Initials</b>                              |
| <b>Start Time:</b><br><br>:  | <b>Finish Time:</b><br><br>:                       | <b>Total Time (min):</b><br><br><br>*do not include breaks |

|                      |                                                                           |                                                                                                                                                                                                                                                |                                                                                                                                                         |
|----------------------|---------------------------------------------------------------------------|------------------------------------------------------------------------------------------------------------------------------------------------------------------------------------------------------------------------------------------------|---------------------------------------------------------------------------------------------------------------------------------------------------------|
| <b>Age:</b><br>_____ | <b>Sex:</b> <input type="checkbox"/> Male <input type="checkbox"/> Female | <b>Ethnicity:</b><br><input type="checkbox"/> White<br><input type="checkbox"/> Black<br><input type="checkbox"/> Aboriginal<br><input type="checkbox"/> East Asian<br><input type="checkbox"/> South Asian<br><input type="checkbox"/> Other: | <b>Marital Status:</b><br><input type="checkbox"/> Single<br><input type="checkbox"/> Married/Common Law<br><input type="checkbox"/> Divorced/separated |
|----------------------|---------------------------------------------------------------------------|------------------------------------------------------------------------------------------------------------------------------------------------------------------------------------------------------------------------------------------------|---------------------------------------------------------------------------------------------------------------------------------------------------------|

|                                                                   |                                                                                                                                                      |                                                                                                                                                                         |                                                                                                                                                                  |                                                                                                                                 |
|-------------------------------------------------------------------|------------------------------------------------------------------------------------------------------------------------------------------------------|-------------------------------------------------------------------------------------------------------------------------------------------------------------------------|------------------------------------------------------------------------------------------------------------------------------------------------------------------|---------------------------------------------------------------------------------------------------------------------------------|
| <b>Do you have any of the following medical or health issues?</b> | <input type="checkbox"/> HIV<br><input type="checkbox"/> Hep B/C<br><input type="checkbox"/> IV drug use<br><input type="checkbox"/> Non IV drug use | <input type="checkbox"/> Diabetes mellitus<br><input type="checkbox"/> High blood pressure<br><input type="checkbox"/> Heart disease<br><input type="checkbox"/> Asthma | <input type="checkbox"/> Alcohol use<br><input type="checkbox"/> Depression<br><input type="checkbox"/> Schizophrenia<br><input type="checkbox"/> Osteoarthritis | <input type="checkbox"/> Tuberculosis<br><input type="checkbox"/> Smoking (PY ____)<br><input type="checkbox"/> Other:<br>_____ |
|-------------------------------------------------------------------|------------------------------------------------------------------------------------------------------------------------------------------------------|-------------------------------------------------------------------------------------------------------------------------------------------------------------------------|------------------------------------------------------------------------------------------------------------------------------------------------------------------|---------------------------------------------------------------------------------------------------------------------------------|

**Over your entire lifetime, how long have you been homeless?**  
\_\_\_\_\_

|                                                                                                                                                                                                                                                                                   |                                                                                                                                               |
|-----------------------------------------------------------------------------------------------------------------------------------------------------------------------------------------------------------------------------------------------------------------------------------|-----------------------------------------------------------------------------------------------------------------------------------------------|
| <b>Highest Education Achieved:</b><br><input type="checkbox"/> Less than elementary school (≤ Grade 5)<br><input type="checkbox"/> Junior high school (Grade 6-8)<br><input type="checkbox"/> High school (no graduation)<br><input type="checkbox"/> High school with graduation | <b>Monthly Income:</b><br><input type="checkbox"/> Less than \$500<br><input type="checkbox"/> \$500-1000<br><input type="checkbox"/> >\$1000 |
|-----------------------------------------------------------------------------------------------------------------------------------------------------------------------------------------------------------------------------------------------------------------------------------|-----------------------------------------------------------------------------------------------------------------------------------------------|

|                                                 |  |
|-------------------------------------------------|--|
| <input type="checkbox"/> Some college education |  |
|-------------------------------------------------|--|

|                                                                                |                                                                                                                                                                                           |
|--------------------------------------------------------------------------------|-------------------------------------------------------------------------------------------------------------------------------------------------------------------------------------------|
| <b>1.1</b> Do you have ODSP, Workman's Compensation, or any form of drug plan? | <input type="checkbox"/> Yes<br><input type="checkbox"/> No <i>Go to 1.4</i><br><input type="checkbox"/> Don't know <i>Go to 1.4</i>                                                      |
| <b>1.2</b> Do you know if your insurance covers hearing tests?                 | <input type="checkbox"/> Yes<br><input type="checkbox"/> No<br><input type="checkbox"/> Don't Know                                                                                        |
| <b>1.3</b> Do you know if your insurance covers prescription hearing aids?     | <input type="checkbox"/> Yes<br><input type="checkbox"/> No<br><input type="checkbox"/> Don't Know                                                                                        |
| <b>1.4</b> Do you currently own hearing aids or have a cochlear implant?       | <input type="checkbox"/> Yes<br><input type="checkbox"/> Hearing Aids<br><input type="checkbox"/> Cochlear Implant<br><input type="checkbox"/> No<br><input type="checkbox"/> Don't know  |
| <b>1.5</b> Have you ever used hearing aids or cochlear implants in the past?   | <input type="checkbox"/> Yes<br><input type="checkbox"/> Hearing Aids<br><input type="checkbox"/> Cochlear Implants<br><input type="checkbox"/> No<br><input type="checkbox"/> Don't know |
| <b>1.6</b> Have you ever been diagnosed with an ear condition or hearing loss? | <input type="checkbox"/> Yes _____<br><input type="checkbox"/> No<br><input type="checkbox"/> Don't know                                                                                  |
| <b>1.7</b> Are you taking any ear drops (liquid medication for your eyes)?     | <input type="checkbox"/> Yes<br>What are the names of the drops (or the color/appearance of the eyedrop bottle)? _____<br><input type="checkbox"/> No <input type="checkbox"/> Don't know |
| <b>1.8</b> Have you ever had a surgery and/or procedure done on your ears?     | <input type="checkbox"/> Yes _____<br><input type="checkbox"/> Left<br><input type="checkbox"/> Right<br><input type="checkbox"/> No<br><input type="checkbox"/> Don't know               |

**SECTION II: Noise Exposure**

|                                                                                           |                                                                              |
|-------------------------------------------------------------------------------------------|------------------------------------------------------------------------------|
| <b>2.1</b> Thinking of all the jobs you have ever had, have you ever been exposed to loud | <input type="checkbox"/> Yes<br><input type="checkbox"/> No <i>Go to 3.1</i> |
|-------------------------------------------------------------------------------------------|------------------------------------------------------------------------------|

|                                                                                                                                      |                                |
|--------------------------------------------------------------------------------------------------------------------------------------|--------------------------------|
| noise at work for at least three months?<br>(Loud noise = noise that is so loud that you had to speak in a raised voice to be heard) |                                |
| <b>2.2</b> On average, how many hours per day are you currently exposed to this loud noise?                                          | <input type="checkbox"/> _____ |
| <b>2.3</b> For how many consecutive months have you been exposed to this loud noise?                                                 | <input type="checkbox"/> _____ |

### SECTION III: SUBJECTIVE MEASURE OF HEARING

“This part of the survey is meant to tell us some more information about your hearing. Please answer ‘Yes’ or ‘No’ to the following questions”

|                                                                                                                                     |                                                                                  |
|-------------------------------------------------------------------------------------------------------------------------------------|----------------------------------------------------------------------------------|
| <b>3.1</b> Are you able to hear at all?                                                                                             | <input type="checkbox"/> Yes<br><input type="checkbox"/> No -> Go to Section III |
| <b>3.2</b> Are you usually able to hear what is said in a conversation with one other person in a quiet room without a hearing aid? | <input type="checkbox"/> Yes Go to 3.4<br><input type="checkbox"/> No            |
| <b>3.3</b> Are you usually able to hear what is said in a conversation with one other person in a quiet room with a hearing aid?    | <input type="checkbox"/> Yes<br><input type="checkbox"/> No                      |
| <b>3.4</b> Are you able to hear what is said in a conversation with at least three other people without a hearing aid?              | <input type="checkbox"/> Yes -> Go to Section III<br><input type="checkbox"/> No |
| <b>3.5</b> Are you able to hear what is said in a conversation with at least three other people with a hearing aid?                 | <input type="checkbox"/> Yes<br><input type="checkbox"/> No                      |

### SECTION V: Hearing Handicap Screening Questionnaire for Adults

If you use a hearing aid, please answer according to the way you hear with the aid.

|                                                                                                                         |                                                                                                   |
|-------------------------------------------------------------------------------------------------------------------------|---------------------------------------------------------------------------------------------------|
| <b>4.1</b> Does a hearing problem cause you to feel embarrassed when you meet new people?                               | <input type="checkbox"/> Yes<br><input type="checkbox"/> Sometimes<br><input type="checkbox"/> No |
| <b>4.2</b> Does a hearing problem cause you to feel frustrated when talking to friends or members of your family?       | <input type="checkbox"/> Yes<br><input type="checkbox"/> Sometimes<br><input type="checkbox"/> No |
| <b>4.3</b> Do you have difficulty hearing/understanding social workers, service providers, or others in a work setting? | <input type="checkbox"/> Yes<br><input type="checkbox"/> Sometimes<br><input type="checkbox"/> No |

|                                                                                                                   |                                                                                                   |
|-------------------------------------------------------------------------------------------------------------------|---------------------------------------------------------------------------------------------------|
| <b>4.4</b> Do you feel handicapped by a hearing problem?                                                          | <input type="checkbox"/> Yes<br><input type="checkbox"/> Sometimes<br><input type="checkbox"/> No |
| <b>4.5</b> Does a hearing problem cause you difficulty when visiting friends or relatives?                        | <input type="checkbox"/> Yes<br><input type="checkbox"/> Sometimes<br><input type="checkbox"/> No |
| <b>4.6</b> Does a hearing problem cause you difficulty in the movies or in the theatre?                           | <input type="checkbox"/> Yes<br><input type="checkbox"/> Sometimes<br><input type="checkbox"/> No |
| <b>4.7</b> Does a hearing problem cause you to have arguments with friends or family members?                     | <input type="checkbox"/> Yes<br><input type="checkbox"/> Sometimes<br><input type="checkbox"/> No |
| <b>4.8</b> Does a hearing problem cause you difficulty when listening to TV or radio?                             | <input type="checkbox"/> Yes<br><input type="checkbox"/> Sometimes<br><input type="checkbox"/> No |
| <b>4.9</b> Do you feel that any difficulty with your hearing limits or hampers your personal or social life?      | <input type="checkbox"/> Yes<br><input type="checkbox"/> Sometimes<br><input type="checkbox"/> No |
| <b>4.10</b> Does a hearing problem cause you difficulty when in a crowded setting (for example, lunch or dinner)? | <input type="checkbox"/> Yes<br><input type="checkbox"/> Sometimes<br><input type="checkbox"/> No |

#### SECTION V: ACCESS TO CARE

“This part of the survey is supposed to determine how accessible hearing and ear care services are to you”

|                                                                         |                                                                               |
|-------------------------------------------------------------------------|-------------------------------------------------------------------------------|
| <b>5.1</b> Are you satisfied with your hearing?                         | <input type="checkbox"/> Yes<br><input type="checkbox"/> No<br>Why not? _____ |
| <b>5.2</b> Have you ever seen an audiologist or ear nose throat doctor? | <input type="checkbox"/> Yes _____<br><input type="checkbox"/> No             |

|                                                                                                  |                                                                                                                                                                                                                                                                             |
|--------------------------------------------------------------------------------------------------|-----------------------------------------------------------------------------------------------------------------------------------------------------------------------------------------------------------------------------------------------------------------------------|
| <b>5.3</b> Have you had an ear or hearing problem in the last year?                              | <input type="checkbox"/> Yes<br>What? _____<br><input type="checkbox"/> No → <i>Go to Section 3.5</i>                                                                                                                                                                       |
| <b>5.4</b> Were you able to access care for this problem?                                        | <input type="checkbox"/> Yes      How? _____<br><input type="checkbox"/> No                                                                                                                                                                                                 |
| <b>5.5</b> If free hearing tests were available in downtown Toronto would you use this service?  | <input type="checkbox"/> Yes <input type="checkbox"/> No → <i>Go to H&amp; N Exam</i>                                                                                                                                                                                       |
| <b>5.6</b> Where would you prefer to go in order to receive free ear or hearing care?            | <input type="checkbox"/> Emergency Room at St. Michael's<br><input type="checkbox"/> St. Michael's Ear Nose Throat Clinic<br><input type="checkbox"/> An ear clinic in a shelter<br><input type="checkbox"/> A downtown ear care clinic with walk-in access<br>Other: _____ |
| <b>3.7</b> If the ear clinic were located at St. Michaels Hospital, would you go?                | <input type="checkbox"/> Yes<br><input type="checkbox"/> Possibly<br><input type="checkbox"/> No                                                                                                                                                                            |
| <b>3.8</b> What items would you be most interested in accessing at a free ear clinic?            | <input type="checkbox"/> Free hearing aids<br><input type="checkbox"/> Free ear plugs<br><input type="checkbox"/> Other _____                                                                                                                                               |
| <b>3.9</b> Would you be interested in a free shuttle bus service to bring you to the ear clinic? | <input type="checkbox"/> Yes<br><input type="checkbox"/> Possibly<br><input type="checkbox"/> No                                                                                                                                                                            |

In the event that significant ear pathology has been uncovered, a few open-ended questions may be asked to further elucidate the barriers faced by the HMMH population.

If a patient were found to have significant hearing loss we may also ask: “How has your living situation impacted your ability to seek care for your hearing?”, “Have you seen anyone about your decreased hearing?”

***Head and Neck Exam Data Collection Sheet***

***NASAL EXAM/THROAT EXAM:***

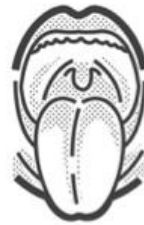

***EARS:***

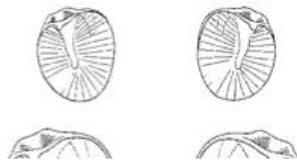

***NECK EXAM:***

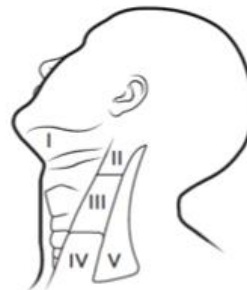

***GROSS NEUROLOGICAL EXAM (cranial nerves):***

***EYE EXAM (Nystagmus):***
